# Supplementary material for: Conformational changes of polyelectrolyte chains in solvent mixtures
Source: Royal Society of Chemistry journal article supplement (doi:10.1039/c6sm00352d), 2016-01-01
Supplement: c6sm00352d5.pdf [file c6sm00352d5.pdf]

### Supplementary Information Movie Caption

#### Supplementary Information Movie 1:

The conformation change of the polyelectrolyte chains in the mixture solvent from the compact states to the semi-flexible states.  $N_p = 10$  chains are included in a simulation box with the periodic boundary conditions. We change the interaction parameter from  $\chi = 2.35$  to  $\chi = 1.8$  at  $t = 0$ . Here,  $\chi = 2.35$  corresponds to the phase-separated state ( $\chi > \chi_t$ ). The colors of the beads represent the ionization degree (see Fig. 2(a)).

#### Supplementary Information Movie 2:

The conformation change of the polyelectrolyte chains in the mixture solvent from the semi-flexible chains to compact states. We change the interaction parameter from  $\chi = 1.8$  to  $\chi = 2.35$  at  $t = 0$ . (see Fig. 2(b)).

#### Supplementary Information Movie 3:

The detailed conformation change of the polyelectrolyte chain in the mixture solvent from the elongated state to the compact state included in a droplet. We change the interaction parameter from  $\chi = 2.1$  to  $\chi = 2.3$  at  $t = 0$ . Here,  $\chi = 2.3$  corresponds to the mixed state ( $\chi < \chi_t$ ). The colors of the beads represent the ionization degree (see Fig. 3(a)).

#### Supplementary Information Movie 4:

The detailed conformation change of the polyelectrolyte chain in the mixture solvent from the compact state to the elongated. We change the interaction parameter from  $\chi = 2.3$  to  $\chi = 2.1$  at  $t = 0$ . (see Fig. 3(b)).
